# Supplementary material for: Epidemiological Changes and Improvement in Outcomes of Infective Endocarditis in Europe in the Twenty-First Century: An International Collaboration on Endocarditis (ICE) Prospective Cohort Study (2000–2012)
Source: Springer Nature journal article supplement (doi:10.1007/s40121-023-00763-8), 2023-03-15
Supplement: MOESM1 [file 24627480]

**Epidemiological Changes and Improvement in Outcomes of Infective Endocarditis in Europe in the 21<sup>st</sup> century: An International Collaboration on Endocarditis (ICE) prospective cohort study (2000–2012).**

Juan Ambrosioni<sup>1,2\*</sup>, Marta Hernández-Meneses<sup>1\*</sup>, Emanuele Durante-Mangoni<sup>3</sup>, Pierre Tattevin<sup>4</sup>, Lars Olaison<sup>5</sup>, Tomas Freiburger<sup>6</sup>, John Hurley<sup>7</sup>, Margaret M. Hannan<sup>7</sup>, Vivian Chu<sup>8</sup>, Bruno Hoen<sup>9</sup>, Asunción Moreno<sup>1</sup>, Guillermo Cuervo<sup>1</sup>, Jaume Llopis<sup>10\*\*</sup>, José M. Miró<sup>1,2\*\*</sup> and International Collaboration for Endocarditis (ICE) investigators<sup>10</sup>

\*Equal contribution as first authors

\*\*Equal contribution as senior authors.

1.- Infectious Diseases Service, Hospital Clinic-IDIBAPS, University of Barcelona, Barcelona, Spain.

2.- CIBERINFEC, Instituto de Salud Carlos III, Madrid, Spain

3- Department of Precision Medicine, University of Campania ‘L. Vanvitelli’, Monaldi Hospital, Naples Italy

4- Infectious Diseases and ICU, Pontchaillou Univ. Hosp., Rennes, France

5- Department of Infectious diseases, Institute of Biomedicine, University of Gothenburg, Gothenburg, Sweden

6- Centre of Cardiovascular Surgery and Transplantation, Brno, and Medical Faculty, Masaryk University, Brno, Czech Republic. 7-

Mater Misericordiae University Hospital, University College Dublin, Ireland 8- Duke University School of Medicine, Durham,

North Carolina, U.S.A.

9- Department of Infectious Diseases and Tropical Medicine and Inserm CIC-1424, University of Lorraine

Medical Center at Nancy, EA 4364 APEMAC, University of Lorraine, Nancy, France. 10- Biostatistics

Department, Faculty of Biology, University of Barcelona, Spain 11-The ICE investigators are listed in

**Appendix I.**

**Key words:** Infective endocarditis, Europe, Epidemiology, Cardiac Surgery, Mortality.

Corresponding author: [jambrosioni@intramed.net](mailto:jambrosioni@intramed.net) (Dr. Juan Ambrosioni)

Infectious Diseases Service. Hospital Clinic. Villarroel 170, 08032, Barcelona, Spain

Corresponding author: [jmmiro@ub.edu](mailto:jmmiro@ub.edu) (Prof. JM Miró)

Infectious Diseases Service. Hospital Clinic. Villarroel 170, 08032, Barcelona, Spain

**Supplementary Figure 1.** Patient flowchart for the specific sub-analysis performed only with centers reporting cases in both periods (N=2665 cases, from 12 centers)

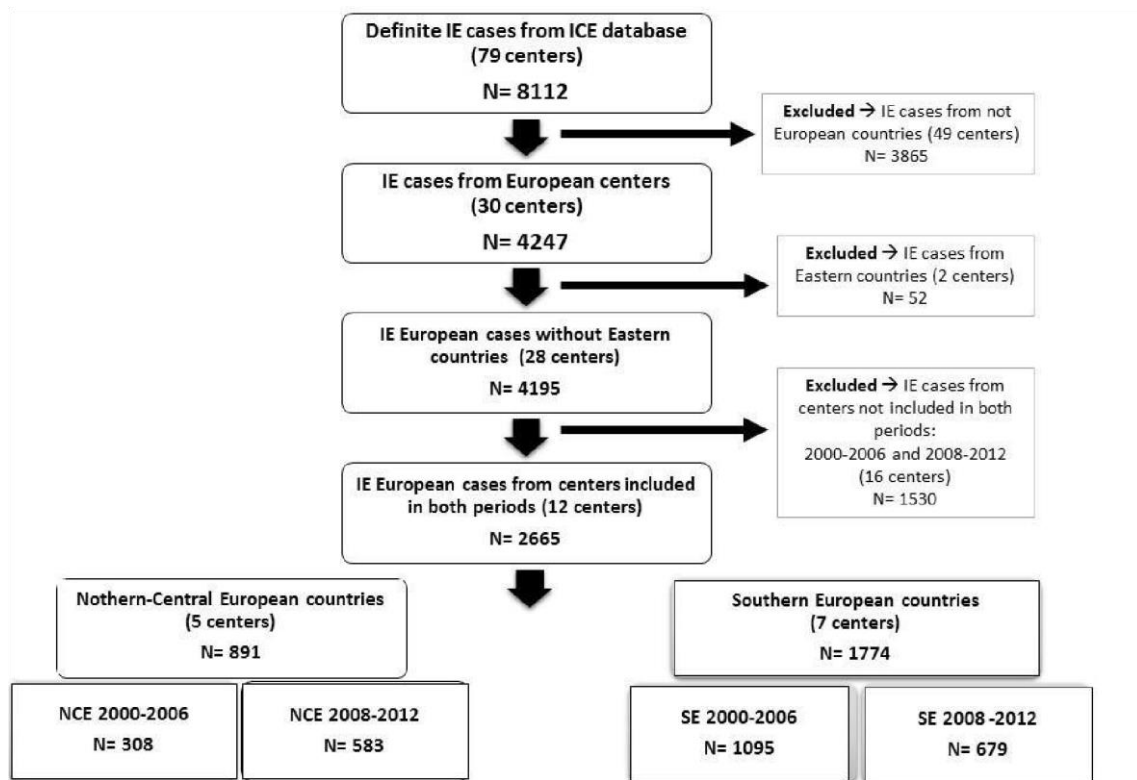

**Supplementary table 1.** Baseline characteristics and predisposing conditions of all cases from the centers included in both periods.

|                                               | Total<br>N= 2665 | NCE<br>N= 891   | SE<br>N=1774    | p     | Early period<br>(2000-2006) N=<br>1403 | Later period<br>(2008-2012) N=<br>1262 | p     |
|-----------------------------------------------|------------------|-----------------|-----------------|-------|----------------------------------------|----------------------------------------|-------|
| Baseline characteristics                      |                  |                 |                 |       |                                        |                                        |       |
| Age (years, median IQR)<br>(N=2665)           |                  | 63<br>(50 – 74) | 63.6<br>(48-74) | 0.18  | 62.8<br>(47-73)                        | 63.7<br>(51-74)                        | 0.02  |
| Male gender (N=2662)                          | 1861<br>(69.9%)  | 636 (71.5%)     | 1225<br>(69.1%) | 0.21  | 978<br>(69.8%)                         | 883<br>(70.1%)                         | 0.86  |
| First sign to admission < 1<br>month (N=2467) | 2048<br>(83%)    | 683<br>(84.6%)  | 1365<br>(82.2%) | 0.13  | 974<br>(76.9%)                         | 1074<br>(89.5%)                        | <0.01 |
| Hemodialysis<br>(N= 1879)                     | 119<br>(6.3%)    | 24<br>(4.7%)    | 95<br>(6.9%)    | 0.06  | 64<br>(4.6%)                           | 55<br>(11.5%)                          | <0.01 |
| Diabetes (N=<br>2632)                         | 523<br>(19.9%)   | 160<br>(18.4%)  | 363<br>(20.6%)  | 0.17  | 239<br>(17.1%)                         | 284<br>(23%)                           | <0.01 |
| Cancer<br>(N= 2641)                           | 261<br>(9.9%)    | 124<br>(10%)    | 137<br>(7.8%)   | <0.01 | 140<br>(10%)                           | 121<br>(9.7%)                          | 0.78  |
| HIV positive (N=<br>2631)                     | 60<br>(2.3%)     | 5 (0.6%)        | 55<br>(3.1%)    | <0.01 | 43<br>(3.1%)                           | 17<br>(1.4%)                           | <0.01 |
| Predisposing conditions                       |                  |                 |                 |       |                                        |                                        |       |
| Previous IE (N=2649)                          | 192<br>(7.2%)    | 36<br>(4.1%)    | 156<br>(8.8%)   | <0.01 | 108<br>(7.7%)                          | 84<br>(6.7%)                           | 0.32  |
| Native valve<br>predisposition* (N=<br>2563)  | 714<br>(27.9%)   | 257<br>(30%)    | 457<br>(26.8%)  | 0.10  | 412<br>(29.9%)                         | 302<br>(25.5%)                         | 0.01  |
| Congenital heart disease (N=<br>2587)         | 243<br>(9.4%)    | 102<br>(11.8%)  | 141<br>(8.2%)   | <0.01 | 105<br>(7.7%)                          | 138<br>(11.2%)                         | <0.01 |
| CIED<br>(N= 2077)                             | 322<br>(15.5%)   | 74<br>(10.8%)   | 248<br>(17.9%)  | <0.01 | 167<br>(19.3%)                         | 155<br>(12.8%)                         | <0.01 |
| Intravenous drug use (N=<br>2647)             | 178<br>(6.7%)    | 37<br>(4.2%)    | 141<br>(8%)     | <0.01 | 115<br>(8.2%)                          | 63 (5%)                                | <0.01 |
| IE Type                                       |                  |                 |                 |       |                                        |                                        |       |
| CA-IE<br>(N=2665)                             | 1899<br>(75.5%)  | 678<br>(86.3%)  | 1221<br>(70.6%) | <0.01 | 1046<br>(77.3%)                        | 853<br>(73.5%)                         | 0.02  |
| N-IE<br>(N=2665)                              | 471<br>(18.7%)   | 80<br>(10.2%)   | 391<br>(22.6%)  | <0.01 | 234<br>(17.3%)                         | 237<br>(20.4%)                         | 0.04  |
| HA-IE<br>(N=2665)                             | 144<br>(5.8%)    | 28<br>(3.5%)    | 116<br>(6.8%)   | <0.01 | 74<br>(5.4%)                           | 70<br>(6.1%)                           | 0.55  |
| Native<br>(N= 2614)                           | 1769<br>(67.7%)  | 622<br>(70.8%)  | 1147<br>(66.1%) | 0.02  | 961<br>(70.5%)                         | 808<br>(64.6%)                         | <0.01 |
| Prosthetic<br>(N= 2614)                       | 626<br>(19.5%)   | 219<br>(24.9%)  | 407<br>(23.5%)  | 0.41  | 299<br>(21.9%)                         | 327<br>(26.1%)                         | 0.01  |
| CIED endocarditis (N=<br>2614)                | 219<br>(8.4%)    | 38<br>(4.3%)    | 181<br>(10.4%)  | <0.01 | 103<br>(7.6%)                          | 116<br>(9.3%)                          | <0.01 |

\*Including aortic regurgitation, aortic stenosis, mitral regurgitation and mitral stenosis.

Abbreviations: NCE: Northern and Central European countries; SE: Southern European countries; HIV: human immunodeficiency virus; IE: infective endocarditis; CA: community-acquired; N: nosocomial, HA: healthcare-associated CIED: cardiovascular implantable electronic devices.

**Supplementary table 2.** Microbiologic etiology comparative analyses between the two predefined regions and two periods of all cases from the centers included in both periods.

|                                                    | Total<br>N=2665 | NCE<br>N= 891  | SE<br>N=1774   | P     | Early period<br>(2000-2006)<br>N= 1403 | Later period<br>(2008-2012) N=<br>1262 | p     |
|----------------------------------------------------|-----------------|----------------|----------------|-------|----------------------------------------|----------------------------------------|-------|
| <i>Staphylococcus aureus</i> (N= 2493)             | 669<br>(26.8%)  | 210<br>(26.2%) | 459<br>(27.2%) | 0.59  | 370<br>(27.2%)                         | 299<br>(26.3)                          | 0.61  |
| <i>Viridans group Streptococci</i> (N= 2493)       | 435<br>(17.4%)  | 128<br>(15.9%) | 307<br>(18.2%) | 0.16  | 245<br>(18%)                           | 190<br>(16.7)                          | 0.39  |
| <i>Coagulase negative Staphylococcus</i> (N= 2493) | 338<br>(13.6%)  | 87<br>(10.8%)  | 251<br>(14.9%) | <0.01 | 170<br>(12.5%)                         | 168<br>(14.8)                          | 0.10  |
| <i>Enterococcus</i> spp. (N= 2493)                 | 263<br>(10.5%)  | 81<br>(10.1%)  | 182<br>(10.8%) | 0.60  | 121<br>(8.9%)                          | 142<br>(12.5%)                         | <0.01 |
| <i>Streptococcus gallolyticus</i> (N= 2493)        | 222<br>(9%)     | 99<br>(12.3%)  | 123<br>(7.3%)  | <0.01 | 120<br>(8.8%)                          | 102<br>(9%)                            | 0.90  |
| <i>Other streptococci</i> * (N= 2493)              | 179<br>(7.2%)   | 81<br>(10.1%)  | 98<br>(5.8%)   | <0.01 | 87<br>(6.4%)                           | 92<br>(8.1%)                           | 0.11  |
| <i>Gram negative</i> (not HACEK**) (N= 2493)       | 97<br>(4%)      | 33<br>(4.1%)   | 64<br>(3.8%)   | 0.70  | 53<br>(3.9%)                           | 44<br>(3.9%)                           | 0.97  |
| Polymicrobial (N= 2493)                            | 41<br>(1.6%)    | 21<br>(2.6%)   | 20<br>(1.2%)   | 0.02  | 7 (0.5%)                               | 34<br>(3.9%)                           | <0.01 |
| HACEK*** (N= 2493)                                 | 31<br>(1.2%)    | 12<br>(1.5%)   | 19<br>(1.1%)   | 0.46  | 18<br>(1.3%)                           | 13<br>(1.1%)                           | 0.68  |
| <i>Fungi</i> (N= 2493)                             | 31<br>(1.2%)    | 10<br>(1.2%)   | 21<br>(1.2%)   | 0.99  | 17<br>(1.3%)                           | 14<br>(1.2%)                           | 0.97  |
| Negative culture (N= 2493)                         | 121<br>(4.9%)   | 21<br>(2.6%)   | 100<br>(5.9%)  | <0.01 | 109<br>(8%)                            | 12<br>(1.1%)                           | <0.01 |
| Other (N= 2493)                                    | 66<br>(2.6%)    | 20<br>(2.5%)   | 46<br>(2.7%)   | 0.73  | 41 (3%)                                | 25<br>(2.2%)                           | 0.20  |

\*Other streptococci includes: *Streptococcus pneumoniae*. betahemolytic group streptococci. etc.

\*\*HACEK group includes: *Haemophilus* species. *Aggregatibacter actinomycetemcomitans*. *Aggregatibacter aphrophilus* (formerly *Haemophilus aphrophilus* and *Haemophilus paraphrophilus*). *Cardiobacterium hominis*. *Eikenella corrodens* and *Kingella* species.

Abbreviations: NCE: Northern and Central European countries; SE: Southern European countries.

**Supplementary table 3.** Echo findings, complications, treatment and outcome of all cases from centers included in both periods.

|                                   | Total<br>N=2665 | NCE<br>N= 891  | SE<br>N=1774    | P     | Early period<br>(2000-2006) N=<br>1403 | Later period<br>(2008-2012) N=<br>1262 | p     |
|-----------------------------------|-----------------|----------------|-----------------|-------|----------------------------------------|----------------------------------------|-------|
| Vegetation findings               |                 |                |                 |       |                                        |                                        |       |
| Intracardiac vegetation (N= 2634) | 2241<br>(85%)   | 720<br>(81.7%) | 1521<br>(86.8%) | <0.01 | 1210<br>(87.1%)                        | 1031<br>(82.8%)                        | <0.01 |

|                                             |                 |                |                |       |                |                |       |
|---------------------------------------------|-----------------|----------------|----------------|-------|----------------|----------------|-------|
| Aortic valve (N=2623)                       | 1062<br>(40.5%) | 362 (41.1%)    | 700 (40.2%)    | 0.63  | 562<br>(40.8%) | 500<br>(40.2%) | 0.75  |
| Mitral valve (N=2622)                       | 989<br>(37.7%)  | 352 (40%)      | 637 (36.5%)    | 0.08  | 528<br>(38.4%) | 461 (37%)      | 0.45  |
| Tricuspid valve (N=2618)                    | 222<br>(8.5%)   | 59 (6.7%)      | 163<br>(9.4%)  | 0.02  | 132<br>(9.6%)  | 90 (7.2%)      | 0.11  |
| Pulmonary valve (N=2614)                    | 27<br>(1%)      | 9 (1%)         | 18 (1%)        | 0.99  | 10 (0.7%)      | 17<br>(1.4%)   | 0.11  |
| Complications                               |                 |                |                |       |                |                |       |
| Stroke (N=2635)                             | 500<br>(19%)    | 202<br>(23.1%) | 298<br>(16.9%) | <0.01 | 255<br>(18.4%) | 245<br>(19.6%) | 0.42  |
| Embolization non-stroke (N=2632)            | 830<br>(31.5%)  | 316<br>(36.1%) | 514<br>(29.3%) | <0.01 | 387<br>(27.9%) | 443 (35.6)     | <0.01 |
| CHF (N= 2628)                               | 921<br>(35%)    | 319<br>(36.6%) | 602<br>(34.3%) | 0.24  | 470<br>(33.8%) | 451<br>(36.4%) | 0.17  |
| Persistent positive blood culture* (N=2571) | 215<br>(8.4%)   | 73<br>(8.4%)   | 142<br>(8.4%)  | 0.98  | 111<br>(8%)    | 104<br>(8.7%)  | 0.53  |
| Intracardiac abscess (N=2629)               | 515<br>(19.6%)  | 238<br>(27.2%) | 277<br>(15.8%) | <0.01 | 228<br>(16.4%) | 287<br>(23.1%) | <0.01 |
| Treatment/outcome                           |                 |                |                |       |                |                |       |
| Surgical therapy (N=2641)                   | 1385<br>(52.4%) | 564<br>(63.6%) | 821<br>(46.8%) | <0.01 | 676<br>(48.5%) | 709<br>(56.9%) | <0.01 |
| In-hospital death (N=2651)                  | 516<br>(19.5%)  | 141<br>(15.9%) | 375<br>(21.2%) | <0.01 | 295<br>(21.1%) | 221<br>(17.7%) | 0.03  |
| One-year follow up                          |                 |                |                |       |                |                |       |
| One-year mortality (N=2201)                 | 681<br>(30.9%)  | 191<br>(25.2%) | 490<br>(33.9%) | <0.01 | 401<br>(29.6%) | 280<br>(33.1%) | 0.09  |
| Relapses (N= 1365)                          | 79<br>(5.8%)    | 25<br>(4.1%)   | 54<br>(7.2%)   | 0.01  | 42<br>(5.6%)   | 37<br>(6.1%)   | 0.70  |

\*Persistent blood cultures were defined as blood cultures that remained positive after 7 days of effective therapy.

Abbreviations: NCE: Northern and Central European countries; SE: Southern European countries; CHF: congestive heart failure

**Supplementary table 4.** Multivariable analysis of factors associated with in-hospital mortality and one-year mortality of all cases from centers included in both periods.

|                                      | In-hospital mortality |              |       | One-year mortality |              |       |
|--------------------------------------|-----------------------|--------------|-------|--------------------|--------------|-------|
|                                      | MULTIVARIATE OR       | CI 95%       | p     | MULTIVARIATE OR    | CI 95%       | p     |
| Charlson                             | 1.31                  | (1.18, 1.45) | <0.01 | 1.33               | (1.18, 1.50) | <0.01 |
| Prosthetic valve IE                  | 1.40                  | (0.97, 1.29) | 0.07  | 1.41               | (0.98, 1.97) | 0.08  |
| <i>Staphylococcus aureus</i> *       | 1.68                  | (1.34, 2.10) | <0.01 | 1.73               | (1.25, 2.40) | <0.01 |
| <i>ConS</i> *                        | 1.41                  | (0.91, 2.20) | 0.12  | 1.55               | (1.03, 2.35) | 0.04  |
| Viridans group <i>Streptococci</i> * | 0.59                  | (0.47, 0.74) | <0.01 | 0.63               | (0.41, 0.95) | 0.03  |
| Intracardiac vegetation              | 2.11                  | (1.33, 3.38) | <0.01 | 1.35               | (0.89, 2.07) | 0.16  |
| Stroke                               | 2.72                  | (1.98, 3.72) | <0.01 | 1.86               | (1.35, 2.56) | <0.01 |
| CHF                                  | 3.12                  | (2.35, 4.14) | <0.01 | 2.48               | (1.88, 3.27) | <0.01 |
| Persistent positive blood culture    | 2.66                  | (1.76, 4.04) | <0.01 | 2.24               | (1.45, 3.47) | <0.01 |
| Paravalvular complications           | 2.69                  | (1.91, 3.78) | <0.01 | 1.87               | (1.38, 2.54) | <0.01 |
| N IE and HA IE vs CA IE              | 1.64                  | (1.31, 2.08) | <0.01 | 1.15               | (0.82, 1.43) | 0.42  |
| In-hospital surgery                  | 0.59                  | (0.44, 0.88) | <0.01 | 0.55               | (0.41, 0.74) | <0.01 |
| European region (NCE vs SE)          | 0.63                  | (0.44, 0.88) | <0.01 | 0.72               | (0.52, 1.02) | 0.06  |
| Period (2008-2012 vs 2000-2006)      | 0.63                  | (0.44, 0.88) | 0.01  | 0.97               | 80.66, 1.44) | 0.90  |

\*The reference group is the rest of the etiological microorganisms. Abbreviations: NCE: Northern and Central European countries; SE: Southern European countries; IE: infective endocarditis; CHF: congestive heart failure; CA: community acquired; N: nosocomial; HA: health-care associated; IE: infective endocarditis.

## ICE Authorship Index 2022

*Last updated: December 21, 2022*

**Argentina:** Liliana Clara, MD, Marisa Sanchez, MD (*Hospital Italiano*). José Casabé, MD, PhD, Claudia Cortes, MD, (*Hospital Universitario de la Fundación Favaloro*). Francisco Nacinovich, MD, Pablo Fernandez Oses, MD, Ricardo Ronderos, MD, Adriana Sucari, MD, Jorge Thierer, MD (*Instituto Cardiovascular*). Javier Altclas, MD, Silvia Kogan, MD (*Sanatorio de la Trinidad Mitre*).

**Australia:** Denis Spelman, MD (*Alfred Hospital*). Eugene Athan, MD, Owen Harris, MBBS, (*Barwon Health*). Karina Kennedy, MBBS, Ren Tan, MBBS (*Canberra Hospital*). David Gordon, MBBS, PhD, Lito Papanicolas, MBBS (*Flinders Medical Centre*). Tony Korman, MD, Despina Kotsanas, BSc (Hons) (*Southern Health*). Robyn Dever, MD, Phillip Jones, MD, Pam Konecny, MD, Richard Lawrence, MD, David Rees, MD, Suzanne Ryan, MHSc (*St. George Hospital*). Michael P. Feneley, MD, John Harkness, MD, Phillip Jones, MD, Suzanne Ryan, MHSc (*St. Vincent's*). Phillip Jones, MD, Suzanne Ryan, MHSc (*Sutherland*). Phillip Jones, MD, Jeffrey Post, MD, Porl Reinbott, Suzanne Ryan, MHSc (*The University of New South Wales*).

**Austria:** Rainer Gattringer, MD, Franz Wiesbauer, MD (*Vienna General Hospital*). **Brazil:** Adriana Ribas Andrade, Ana Cláudia Passos de Brito, Armenio Costa Guimarães, MD (*Ana Neri Hospital*). Max Grinberg, MD, PhD, Alfredo José Mansur MD, PhD, Rinaldo Focaccia Siciliano, MD, Tania Mara Varejao Strabelli, MD, Marcelo Luiz Campos Vieira, MD (*Heart Institute (Incor), University of Sao Paulo Medical School*). Regina Aparecida de Medeiros Tranches, MD, Marcelo Goulart Paiva, MD (*Hospital 9 de Julho*). Claudio Querido Fortes, MD, PhD (*Hospital Universitario Clementino Fraga Filho/UFRJ*). Auristela de Oliveira Ramos, MD (*Instituto Dante Pazzanese de Cardiologia*). Clara Weksler, MD, Giovanna Ferraiuoli MD, Wilma Golebiovski, MD, (*Instituto Nacional de Cardiologia*), Cristiane Lamas, MD MRCP PhD (*Unigranrio and Instituto Nacional de Cardiologia, Rio de Janeiro*). **Canada:** James A. Karlowsky, MD, Yoav Keynan, MD, Andrew M. Morris, MD, Ethan Rubinstein, MD, LL.B (*University of Manitoba*).

**Chile:** Sandra Braun Jones, MD, Patricia Garcia, MD (*Hospital Clínico Pont. Universidad Católica de Chile*). M Cereceda, MD, Alberto Fica, Rodrigo Montagna Mella, MD (*Hospital Clinico Universidad de Chile*).

**Columbia:** Ricardo Fernandez, MD, Liliana Franco, MD, Javier Gonzalez, MD, Astrid Natalia Jaramillo, MD (*Clinica Cardiovascular Medellín*)

**Croatia:** Bruno Barsic, MD, PhD, Suzana Bukovski, MD, PhD Vladimir Krajinovic, MD, Ana Pangercic, MD, Igor Rudez, MD, Josip Vincelj, MD, PhD (*University Hospital for Infectious Diseases*).

**Czech Republic:** Tomas Freiburger, MD, PhD, (Ceitec, Masaryk University, Brno) Jiri Pol, MD, Barbora Zaloudikova, MSc (*Centre for Cardiovascular Surgery and Transplantation*).

**Egypt:** Zainab Ashour, MD, Amani El Kholy, MD, Marwa Mishaa, MD, Dina Osama, MD, Hussien Rizk, MD (*Cairo University Medical School*).

**France:** Nejla Aissa, MD, Corentine Alauzet, MD, Francois Alla, MD, PhD, CHU Catherine Campagnac, RN, Thanh Doco-Lecompte, MD, Christine Selton-Suty, MD (*CHU Nancy-Brabois*). Jean-Paul Casalta, MD, Pierre-Edouard Fournier, MD,

Gilbert Habib, MD, Didier Raoult, MD, PhD, Franck Thuny, MD (*Faculté de Médecine de Marseille*). Francois Delahaye, MD, PhD, Armelle Delahaye, Francois Vandenesch, MD (*Hospital Louis Pradel*). Erwan Donal, MD, Pierre Yves Donnio, PhD, Erwan Flecher, MD, PhD, Christian Michelet, MD, PhD, Matthieu Revest, MD, Pierre Tattevin, MD, PhD, (*Pontchaillou University*). Florent Chevalier, MD, Antoine Jeu, MD, Jean Paul Rémaidi, MD, Dan Rusinaru, MD, Christophe Tribouilloy, MD, PhD (*South Hospital Amiens*). Yvette Bernard, MD, Catherine Chirouze, MD, Bruno Hoen, MD, PhD, Joel Leroy, MD, Patrick Plesiat, MD (*University Medical Center of Besançon*).



**Germany:** Christoph Naber, MD, PhD, Carl Neuerburg (*Universitaetskliniken Bergmannsheil Bochum*). Bahram Mazaheri, PhD, Christoph Naber, MD, PhD, Carl Neuerburg (*University Essen*).

**Greece:** Sophia Athanasia, Ioannis Deliolas, Helen Giamarellou, MD, PhD, Tsaganos Thomas, MD, Efthymia Giannitsioti, MD (*Attikon University General*

*Hospital*). Elena Mylona MD, Olga Paniara MD, PhD, Konstantinos Papanicolaou, MD, John Pyros MD, Athanasios Skoutelis MD, PhD (*Evangelismos General Hospital of Athens*). Elena Mylona, MD, Olga Paniara, MD, PhD, Konstantinos Papanicolaou, MD, John Pyros, MD, Athanasios Skoutelis, MD, PhD

(*Evangelismos General Hospital of Athens*)

**India:** Gautam Sharma, MD (*All India Institute of Medical Sciences*). Johnson Francis, MD, DM, Lathi Nair, MD, DM, Vinod Thomas, MD, DM, Krishnan Venugopal, MD, DM (*Medical College Calicut*).

**Ireland:** Margaret M. Hannan, MB, BCh BAO, MSc, John P. Hurley, MB, BCh (*Mater Hospitals*).

**Israel:** Maor Wanounou, MD, Dan Gilon, MD, Sarah Israel, MD,

Maya Korem, MD, Jacob Strahilevitz, MD (*Hadassah-Hebrew University*). Ethan Rubinstein, MD, LL.B., Jacob Strahilevitz, MD (*Tel Aviv University School of Medicine*).

**Italy:** Emanuele Durante-Mangoni MD, PhD, Domenico Iossa PhD, Serena Orlando MD, Maria Paola Ursi MD, Pia Clara Pafundi PhD, Fabiana D'Amico BSc, Mariano Bernardo MSc, Susanna Cuccurullo MSc, Giovanni Dialetto MD, Franco Enrico Covino MD, Sabrina Manduca MD, Alessandro Della Corte MD, PhD, Marisa De Feo MD, PhD (*Università della Campania, Italy*); Marie Françoise Tripodi MD (*University of Salerno*); Enrico Cecchi, MD, Francesco De Rosa, MD, Davide Forno, MD, Massimo Imazio, MD, Rita Trincherio, MD (*Maria Vittoria Hospital*). Paolo Grossi, MD, PhD, Mariangela Lattanzio, MD, Antonio Toniolo, MD (*Ospedale di Circolo Varese*). Antonio Goglio, MD, Annibale Raglio, MD, DTM&H, Veronica Ravasio, MD, Marco Rizzi, MD, Fredy Suter, MD (*Ospedali Riuniti di Bergamo*). Giampiero Carosi, MD, Silvia Magri, MD, Liana Signorini, MD (*Spedali Civili – Università di Brescia*).

**Lebanon:** Zeina Kanafani, MD, MS, Souha S.Kanj, MD, Ahmad Sharif-Yakan, M.D (*American University of Beirut Medical Center*).

**Malaysia:** Imran Abidin, MD (*University of Malaya Medical Center*). Syahidah Syed Tamin, MD (*National Heart Institute*) **Mexico:** Eduardo Rivera Martínez, MD, Gabriel Israel Soto Nieto, MD (*Instituto Nacional de Cardiología Ignacio Chávez*).

**Netherlands:** Jan T.M. van der Meer, MD, PhD (*University of Amsterdam*).

**New Zealand:** Stephen Chambers, MD, MSc (*University of Otago*), David Holland, MB, ChB, PhD (*Middlemore Hospital*), Arthur Morris, MD (*Diagnostic Medlab*), Nigel Raymond, MB, ChB (*Wellington Hospital*), Kerry Read, MB, ChB (*North Shore Hospital*). David R. Murdoch, MD, MSc, DTM&H (*University of Otago*).

**Romania:** Stefan Dragulescu, MD, PhD, Adina Ionac, MD, PhD, Cristian Mornos, MD (*Victor Babes University of Medicine and Pharmacy*).

**Russia:** O.M. Butkevich, PhD (*Learning-Scientific Centre of Medical Centre of Russian Presidential Affairs Government Medical Centre of Russian*). Natalia Chipigina, PhD, Ozerecky Kirill, MD, Kulichenko Vadim, Tatiana Vinogradova, MD, PhD (*Russian Medical State University*)

**Saudi Arabia:** Jameela Edathodu, MBBS, Magid Halim, MBBS (*King Faisal Specialist Hospital & Research Center*).

**Singapore:** Yee-Yun Liew, Ru-San Tan, MBBS (*National Heart Centre*).

**Slovenia:** Tatjana Lejko-Zupanc, MD, PhD, Mateja Logar, MD, PhD, Manica Mueller-Premru, MD, PhD (*Medical Center Ljubljana*).

**South Africa:** Patrick Commerford, MD, Anita Commerford, MD, Eduan Deetlefs, MD, Cass Hansa, MD, Mpiko Ntsekhe, MD (*University of Cape Town and Groote Schuur Hospital*).

**Spain:** Manel Almela, MD, Juan Ambrosioni, MD, PhD, Manuel Azqueta, MD, Merce Brunet, MD, PhD, Pedro Castro, MD PhD, Elisa De Lazzari, MS, Carlos Falces, MD, David Fuster, MD, PhD, Guillermina Fita, MD, Cristina Garcia-de-la-Maria, PhD, Javier Garcia-Gonzalez, MS,

Jose M. Gatell, MD,PhD, Jaume Llopis, MD, PhD, Francesc Marco, MD, PhD, , José M. Miró, MD, PhD, Asuncion Moreno, MD, PhD, José Ortiz, MD, PhD, Salvador Ninot, MD, J. Carlos Paré, MD, PhD, Juan M Pericas, MD, Eduard Quintana, MD, PhD, Jose Ramirez, MD, PhD, Irene Rovira MD, Elena Sandoval, MD, Marta Sitges,MD, PhD, Adrian Tellez, MD, José M. Tolosana, MD, PhD, Barbara Vidal, MD, PhD, Jordi Vila, MD, PhD (*Hospital Clinic – IDIBAPS. University of Barcelona, Barcelona, Spain*). University of Barcelona, Barcelona, Spain). Ignasi Anguera, MD, PhD, Bemat Font, MD, Joan Raimon Guma, MD (*Hospital de Sabadell*). Javier Bermejo, Emilio Bouza, MD, PhD, Miguel Angel Garcia Fernández, MD, Victor Gonzalez-Ramallo, MD, Mercedes Marín, MD, Patricia Muñoz, MD, PhD, Miguel Pedromingo, MD, Jorge Roda, Marta Rodríguez-Crèixems, MD, PhD, Jorge Solis, MD (*Hospital General Universitario Gregorio Marañón*). Benito Almirante, MD, Nuria Fernandez-Hidalgo, MD, Pilar Tornos, MD (*Hospital Universitari Vall d'Hebron*). Arístides de Alarcón, Ricardo Parra (*Hospital Universitario Virgen del Rocío*).

**Sweden:** Eric Alestig, MD, Magnus Johansson, MD, PhD, Lars Olaison, MD, PhD, Ulrika Snygg Martin, MD (*Sahlgrenska Universitetssjukhuset/Östra*).

**Thailand:** Orathai Pachirat, MD, Pimchitra Pachirat, MD, Burabha Pussadhamma, MD, Vichai Senthong, MD (*Khon Kaen University*).

**United Kingdom:** Anna Casey, MBBS, Tom Elliott, PhD, DSc, Peter Lambert, BSc, PhD, DSc, Richard Watkin, MBBS (*Queen Elizabeth Hospital*). Christina Eyton, John L. Klein, MD (*St. Thomas' Hospital*).

**United States of America:** Suzanne Bradley, MD, Carol Kauffman, MD (*Ann Arbor VA Medical Center*). Roger Bedimo, MD, MS (*Dallas VA Medical Center*). Vivian H. Chu, MD, MHS, G. Ralph Corey, MD, Anna Lisa Crowley, MD, MHS, Pamela Douglas, MD, Laura Drew, RN, BSN, Vance G. Fowler, MD, MHS, Thomas Holland, MD, Tahaniyat Lalani, MBBS, MHS, Daniel Mudrick, MD, Zaniab Samad, MD, MHS, Daniel Sexton, MD, Martin Stryjewski, MD, MHS, Andrew Wang, MD, Christopher W. Woods, MD, MPH (*Duke University Medical Center*). Stamatios Lerakis, MD (*Emory University*). Robert Cantey, MD, Lisa Steed, PhD, Dannah Wray, MD, MHS (*Medical University of South Carolina*). Stuart A. Dickerman, MD (*New York University Medical Center*). Hector Bonilla, MD, Joseph DiPersio, MD, PhD, Sara-Jane Salstrom, RN (*Summa Health System*). John Baddley, MD, Mukesh Patel, MD (*University of Alabama at Birmingham*). Gail Peterson, MD, Amy Stancoven, MD (*UT-Southwestern Medical Center*). Donald Levine, MD, Jonathan Riddle, Michael Rybak, Pham D, MPH (*Wayne State University*). Christopher H. Cabell, MD, MHS (*Quintiles*)

**ICE Coordinating Center:** Khaula Baloch, MPH, Vivian H. Chu, MD, MHS, G. Ralph Corey, MD, Christy C. Dixon, Vance G. Fowler, Jr, MD, MHS, Tina Harding, RN, BSN, Marian Jones-Richmond, Lawrence P. Park, PhD, Bob Sanderford, Judy Stafford, MS

**ICE Publications Committee:** Kevin Anstrom, PhD, Eugene Athan, MD, Arnold S. Bayer, MD, Christopher H. Cabell, MD, MHS, Vivian H. Chu, MD, MHS, G. Ralph Corey, MD, Vance G. Fowler, Jr, MD, MHS, Bruno Hoen, MD, PhD, A W Karchmer MD, José M. Miró, MD, PhD, David R. Murdoch, MD, MSc, DTM&H, Daniel J. Sexton MD, Andrew Wang MD

**ICE Steering Committee:** Arnold S. Bayer, MD, Christopher H Cabell, MD, MHS, Vivian Chu MD, MHS. G. Ralph Corey MD, David T. Durack, MD, D Phil, Susannah Eykyn MD, Vance G. Fowler, Jr, MD, MHS, Bruno Hoen MD, PhD, José M. Miró, MD, PhD, Phillipe Moreillon, MD PhD, Lars Olaison, MD, PhD, Didier Raoult, MD, PhD, Daniel J, Sexton, MD
